# Supplementary material for: Are current machine learning applications comparable to radiologist classification of degenerate and herniated discs and Modic change? A systematic review and meta-analysis
Source: Springer Nature journal article supplement (doi:10.1007/s00586-023-07718-0), 2023-05-07
Supplement: MOESM3 [file 25331630]

# Print Search History

---

[web.p.ebscohost.com/ehost/searchhistory/PrintSearchHistory](http://web.p.ebscohost.com/ehost/searchhistory/PrintSearchHistory)

## Accessibility Information and Tips

Thursday, April 21, 2022 10:08:22 AM

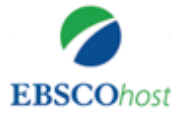

| # | Query | Limiters/Expanders | Last Run Via | Results |
|---|-------|--------------------|--------------|---------|
|---|-------|--------------------|--------------|---------|

|    |                     |                                                                              |                                                                                                                                                                                                                                                                                                                                                                                                                                                                                                                                                                                                                                                                                                                                                                                                                                                                                                                                                                                                                                                                                                                                                                                                                                                                                                                                                                                                                     |     |
|----|---------------------|------------------------------------------------------------------------------|---------------------------------------------------------------------------------------------------------------------------------------------------------------------------------------------------------------------------------------------------------------------------------------------------------------------------------------------------------------------------------------------------------------------------------------------------------------------------------------------------------------------------------------------------------------------------------------------------------------------------------------------------------------------------------------------------------------------------------------------------------------------------------------------------------------------------------------------------------------------------------------------------------------------------------------------------------------------------------------------------------------------------------------------------------------------------------------------------------------------------------------------------------------------------------------------------------------------------------------------------------------------------------------------------------------------------------------------------------------------------------------------------------------------|-----|
| S4 | S1 AND S2<br>AND S3 | Expanders - Apply<br>equivalent subjects<br>Search modes -<br>Boolean/Phrase | Interface - EBSCOhost Research<br>Databases<br>Search Screen - Advanced<br>Search<br>Database - Academic Search<br>Complete;AHFS Consumer<br>Medication Information;APA<br>PsycInfo;Art & Architecture<br>Complete;Biography Reference<br>Center;Biography Reference<br>eBook Collection;Business Source<br>Complete;CINAHL<br>Complete;CINAHL Plus with Full<br>Text;Cochrane Central Register of<br>Controlled Trials;Cochrane<br>Clinical Answers;Cochrane<br>Database of Systematic<br>Reviews;Cochrane Methodology<br>Register;Current Biography<br>Illustrated (H.W. Wilson);eBook<br>Academic Collection<br>(EBSCOhost);eBook Business<br>Collection (EBSCOhost);eBook<br>Collection (EBSCOhost);eBook<br>Open Access (OA) Collection<br>(EBSCOhost);Entrepreneurial<br>Studies Source;Environment<br>Complete;ERIC;GreenFILE;Health<br>Source - Consumer Edition;Health<br>Source: Nursing/Academic<br>Edition;Library, Information<br>Science & Technology Abstracts<br>with Full Text;Literary Reference<br>Center Plus;Literary Reference<br>eBook Collection;MasterFILE<br>Premier;MasterFILE Reference<br>eBook Collection;Mental<br>Measurements Yearbook with<br>Tests in Print;Military &<br>Government<br>Collection;Newspaper Source<br>Plus;Newswires;OmniFile Full<br>Text Mega (H.W. Wilson);Points of<br>View Reference Center;Regional<br>Business News;Teacher<br>Reference Center;Web News | 303 |
|----|---------------------|------------------------------------------------------------------------------|---------------------------------------------------------------------------------------------------------------------------------------------------------------------------------------------------------------------------------------------------------------------------------------------------------------------------------------------------------------------------------------------------------------------------------------------------------------------------------------------------------------------------------------------------------------------------------------------------------------------------------------------------------------------------------------------------------------------------------------------------------------------------------------------------------------------------------------------------------------------------------------------------------------------------------------------------------------------------------------------------------------------------------------------------------------------------------------------------------------------------------------------------------------------------------------------------------------------------------------------------------------------------------------------------------------------------------------------------------------------------------------------------------------------|-----|

|    |                                                                                                                                                                                                                                                                                                           |                                                                        |                                                                                                                                                                                                                                                                                                                                                                                                                                                                                                                                                                                                                                                                                                                                                                                                                                                                                                                                                                                                                                                                                                                                                                                                                                                                                    |           |
|----|-----------------------------------------------------------------------------------------------------------------------------------------------------------------------------------------------------------------------------------------------------------------------------------------------------------|------------------------------------------------------------------------|------------------------------------------------------------------------------------------------------------------------------------------------------------------------------------------------------------------------------------------------------------------------------------------------------------------------------------------------------------------------------------------------------------------------------------------------------------------------------------------------------------------------------------------------------------------------------------------------------------------------------------------------------------------------------------------------------------------------------------------------------------------------------------------------------------------------------------------------------------------------------------------------------------------------------------------------------------------------------------------------------------------------------------------------------------------------------------------------------------------------------------------------------------------------------------------------------------------------------------------------------------------------------------|-----------|
| S3 | artificial intelligence or machine learning or computer learning or reinforcement learning or supervised learning or unsupervised learning or computer vision or deep learning or neural network or NN or artificial neural network or SVM or random forest or CNN or Naïve Bayes or KNN or Decision Tree | Expanders - Apply equivalent subjects<br>Search modes - Boolean/Phrase | Interface - EBSCOhost Research Databases<br>Search Screen - Advanced Search<br>Database - Academic Search Complete;AHFS Consumer Medication Information;APA PsycInfo;Art & Architecture Complete;Biography Reference Center;Biography Reference eBook Collection;Business Source Complete;CINAHL Complete;CINAHL Plus with Full Text;Cochrane Central Register of Controlled Trials;Cochrane Clinical Answers;Cochrane Database of Systematic Reviews;Cochrane Methodology Register;Current Biography Illustrated (H.W. Wilson);eBook Academic Collection (EBSCOhost);eBook Business Collection (EBSCOhost);eBook Collection (EBSCOhost);eBook Open Access (OA) Collection (EBSCOhost);Entrepreneurial Studies Source;Environment Complete;ERIC;GreenFILE;Health Source - Consumer Edition;Health Source: Nursing/Academic Edition;Library, Information Science & Technology Abstracts with Full Text;Literary Reference Center Plus;Literary Reference eBook Collection;MasterFILE Premier;MasterFILE Reference eBook Collection;Mental Measurements Yearbook with Tests in Print;Military & Government Collection;Newspaper Source Plus;Newswires;OmniFile Full Text Mega (H.W. Wilson);Points of View Reference Center;Regional Business News;Teacher Reference Center;Web News | 1,632,973 |
|----|-----------------------------------------------------------------------------------------------------------------------------------------------------------------------------------------------------------------------------------------------------------------------------------------------------------|------------------------------------------------------------------------|------------------------------------------------------------------------------------------------------------------------------------------------------------------------------------------------------------------------------------------------------------------------------------------------------------------------------------------------------------------------------------------------------------------------------------------------------------------------------------------------------------------------------------------------------------------------------------------------------------------------------------------------------------------------------------------------------------------------------------------------------------------------------------------------------------------------------------------------------------------------------------------------------------------------------------------------------------------------------------------------------------------------------------------------------------------------------------------------------------------------------------------------------------------------------------------------------------------------------------------------------------------------------------|-----------|

|    |                                                                                                                                                                                                     |                                                                                |                                                                                                                                                                                                                                                                                                                                                                                                                                                                                                                                                                                                                                                                                                                                                                                                                                                                                                                                                                                                                                                                                                                                                                                                                                                                                                         |         |
|----|-----------------------------------------------------------------------------------------------------------------------------------------------------------------------------------------------------|--------------------------------------------------------------------------------|---------------------------------------------------------------------------------------------------------------------------------------------------------------------------------------------------------------------------------------------------------------------------------------------------------------------------------------------------------------------------------------------------------------------------------------------------------------------------------------------------------------------------------------------------------------------------------------------------------------------------------------------------------------------------------------------------------------------------------------------------------------------------------------------------------------------------------------------------------------------------------------------------------------------------------------------------------------------------------------------------------------------------------------------------------------------------------------------------------------------------------------------------------------------------------------------------------------------------------------------------------------------------------------------------------|---------|
| S2 | <p>intervertebral disk or intervertebral or endplate or intervertebral disc or disc degeneration or Modic change or Schmorls nodes or myelopathy or spondylosis or Pfirrmann or spinal stenosis</p> | <p>Expanders - Apply equivalent subjects<br/>Search modes - Boolean/Phrase</p> | <p>Interface - EBSCOhost Research Databases<br/>Search Screen - Advanced Search<br/>Database - Academic Search Complete;AHFS Consumer Medication Information;APA PsycInfo;Art &amp; Architecture Complete;Biography Reference Center;Biography Reference eBook Collection;Business Source Complete;CINAHL Complete;CINAHL Plus with Full Text;Cochrane Central Register of Controlled Trials;Cochrane Clinical Answers;Cochrane Database of Systematic Reviews;Cochrane Methodology Register;Current Biography Illustrated (H.W. Wilson);eBook Academic Collection (EBSCOhost);eBook Business Collection (EBSCOhost);eBook Collection (EBSCOhost);eBook Open Access (OA) Collection (EBSCOhost);Entrepreneurial Studies Source;Environment Complete;ERIC;GreenFILE;Health Source - Consumer Edition;Health Source: Nursing/Academic Edition;Library, Information Science &amp; Technology Abstracts with Full Text;Literary Reference Center Plus;Literary Reference eBook Collection;MasterFILE Premier;MasterFILE Reference eBook Collection;Mental Measurements Yearbook with Tests in Print;Military &amp; Government Collection;Newspaper Source Plus;Newswires;OmniFile Full Text Mega (H.W. Wilson);Points of View Reference Center;Regional Business News;Teacher Reference Center;Web News</p> | 110,862 |
|----|-----------------------------------------------------------------------------------------------------------------------------------------------------------------------------------------------------|--------------------------------------------------------------------------------|---------------------------------------------------------------------------------------------------------------------------------------------------------------------------------------------------------------------------------------------------------------------------------------------------------------------------------------------------------------------------------------------------------------------------------------------------------------------------------------------------------------------------------------------------------------------------------------------------------------------------------------------------------------------------------------------------------------------------------------------------------------------------------------------------------------------------------------------------------------------------------------------------------------------------------------------------------------------------------------------------------------------------------------------------------------------------------------------------------------------------------------------------------------------------------------------------------------------------------------------------------------------------------------------------------|---------|

|    |                                                                                                                           |                                                                        |                                                                                                                                                                                                                                                                                                                                                                                                                                                                                                                                                                                                                                                                                                                                                                                                                                                                                                                                                                                                                                                                                                                                                                                                                                                                                    |           |
|----|---------------------------------------------------------------------------------------------------------------------------|------------------------------------------------------------------------|------------------------------------------------------------------------------------------------------------------------------------------------------------------------------------------------------------------------------------------------------------------------------------------------------------------------------------------------------------------------------------------------------------------------------------------------------------------------------------------------------------------------------------------------------------------------------------------------------------------------------------------------------------------------------------------------------------------------------------------------------------------------------------------------------------------------------------------------------------------------------------------------------------------------------------------------------------------------------------------------------------------------------------------------------------------------------------------------------------------------------------------------------------------------------------------------------------------------------------------------------------------------------------|-----------|
| S1 | MRI or magnetic resonance or MR imaging or radiology or medical images or "CT" or computed tomography or imaging or X-ray | Expanders - Apply equivalent subjects<br>Search modes - Boolean/Phrase | Interface - EBSCOhost Research Databases<br>Search Screen - Advanced Search<br>Database - Academic Search Complete;AHFS Consumer Medication Information;APA PsycInfo;Art & Architecture Complete;Biography Reference Center;Biography Reference eBook Collection;Business Source Complete;CINAHL Complete;CINAHL Plus with Full Text;Cochrane Central Register of Controlled Trials;Cochrane Clinical Answers;Cochrane Database of Systematic Reviews;Cochrane Methodology Register;Current Biography Illustrated (H.W. Wilson);eBook Academic Collection (EBSCOhost);eBook Business Collection (EBSCOhost);eBook Collection (EBSCOhost);eBook Open Access (OA) Collection (EBSCOhost);Entrepreneurial Studies Source;Environment Complete;ERIC;GreenFILE;Health Source - Consumer Edition;Health Source: Nursing/Academic Edition;Library, Information Science & Technology Abstracts with Full Text;Literary Reference Center Plus;Literary Reference eBook Collection;MasterFILE Premier;MasterFILE Reference eBook Collection;Mental Measurements Yearbook with Tests in Print;Military & Government Collection;Newspaper Source Plus;Newswires;OmniFile Full Text Mega (H.W. Wilson);Points of View Reference Center;Regional Business News;Teacher Reference Center;Web News | 4,088,168 |
|----|---------------------------------------------------------------------------------------------------------------------------|------------------------------------------------------------------------|------------------------------------------------------------------------------------------------------------------------------------------------------------------------------------------------------------------------------------------------------------------------------------------------------------------------------------------------------------------------------------------------------------------------------------------------------------------------------------------------------------------------------------------------------------------------------------------------------------------------------------------------------------------------------------------------------------------------------------------------------------------------------------------------------------------------------------------------------------------------------------------------------------------------------------------------------------------------------------------------------------------------------------------------------------------------------------------------------------------------------------------------------------------------------------------------------------------------------------------------------------------------------------|-----------|
